# Supplementary material
Source: Research Square preprint supplement (doi:10.21203/rs.3.rs-8954144/v1)
Supplement: Supplementary file 1 [file 60adf00139fdb4aaf0ff9dba.docx]

This study uses Mplus to construct structural equation models and conduct latent profile analysis, combined with the R3STEP method for logit regression.

In Mplus, the structural equation model (SEM) is based on the covariance matrix and uses robust maximum likelihood estimation (MLR) as the core estimation method. Its purpose is to simultaneously model the measurement relationships between latent variables and observed indicators, as well as the causal relationships among latent variables. This method assumes that the observed data approximate a multivariate normal distribution and estimates parameters by minimizing the discrepancy between the observed covariance matrix and the model‑implied covariance matrix, thereby emphasizing theoretical model fit rather than purely predictive power.

Latent profile analysis (LPA) is a latent class modeling approach based on mixture models. Its core logic is to iteratively maximize the likelihood function via the EM algorithm, estimating the probability of each individual belonging to each latent class and the class‑specific distribution parameters. LPA assumes local independence—that is, observed indicators are independent given class membership—and focuses on identifying heterogeneous latent subgroups within the sample, rather than directly interpreting causal relationships.

Building on this, the R3STEP method is used to link external covariates with latent classes. Using a three‑step procedure with weighted multinomial logit regression, this method fixes the latent class model while adjusting for uncertainty in class assignment, yielding more accurate regression coefficients and standard errors.

Overall, SEM emphasizes theoretical fit and causal structure, LPA emphasizes the identification of latent classes, and R3STEP accounts for uncertainty in class membership while enabling interpretation of external predictor variables.
