# Supplementary material
Source: Research Square preprint supplement (doi:10.21203/rs.3.rs-8954144/v1)
Supplement: Supplementary file 2 [file fedae2b36fb6f69796ad843d.docx]

**Research questionnaire**

**English Version**

| Factor | Measurement Item |
| --- | --- |
| AI Attitude | A1: I support using AI tools to assist with learning. |
| A2: I believe AI tools play an important role in higher education. |
| A3: I am willing to try different features of AI tools to complete tasks. |
| AI Use Motivation | **Intrinsic Motivation** |
| B1: I use AI learning tools because I find the learning process itself enjoyable. |
| B2: When I use AI learning tools, I feel pleasure and don't mind spending time. |
| B3: I find it enjoyable to explore new knowledge using AI learning tools. |
| **Identified Regulation** |
| B4: I believe using AI learning tools is important for my academic growth and future career development. |
| B5: I use AI learning tools because I feel I should take advantage of all available resources to learn. |
| B6: I use AI learning tools because I value their ability to improve my learning efficiency. |
| **External Regulation** |
| B7: I use AI learning tools because I want to achieve good grades in my courses and exams. |
| B8: I use AI learning tools because my school encourages us to use them. |
| B9: I use AI learning tools because I want to earn more credits or rewards through them. |
| AI Dependency | C1:When completing academic tasks, I feel less confident without the assistance of AI. |
| C2: I find it increasingly difficult to complete assignments independently, always wanting to use AI. |
| C3: When I encounter difficulties, my first reaction is to turn to AI tools for help. |
| C4 :After using AI, I find myself engaging less in deep reading and thinking. |
| C5: I find that my ability to solve complex problems without AI assistance has declined. |

**Chinese Version**

| 维度 | 测量项目 |
| --- | --- |
| AI态度 | A1: 我支持使用AI工具来辅助学习 |
| A2: 我认为AI工具在高等教育中的作用很重要 |
| A3: 我在使用AI工具时，愿意尝试不同的功能来完成任务 |
| AI使用动机 | 内部动机 |
| B1: 我使用AI学习工具是因为我觉得学习过程本身很有趣 |
| B2: 当我使用AI学习工具时，我感到很享受，不介意花费时间 |
| B3: 我发现使用AI学习工具探索新知识是一种乐趣 |
| **认同调节** |
| B4: 我认为使用AI学习工具对我的学术成长和未来职业发展很重要 |
| B5: 我使用AI学习工具是因为我觉得我应该利用所有可用资源来学习 |
| B6: 我使用AI学习工具是因为我认同它对提高我的学习效率的价值 |
| 外部动机 |
| B7: 我使用AI学习工具是因为我想要在课程和考试中获得好成绩 |
| B8: 我使用AI学习工具是因为学校倡导我们使用它 |
| B9: 我使用AI学习工具是因为我想通过它获得更多的学分或奖励 |
| AI依赖 | C1: 我在完成学术任务时，如果没有AI工具的帮助，会感到不自信 |
| C2: 我发现自己越来越难以独立完成作业，总是想要使用AI来获取答案 |
| C3: 当我遇到学习上的困难时，我的第一反应是求助于AI工具，而不是自己解决问题 |
| C4: 使用AI工具后，我发现自己更少地进行深入阅读和思考 |
| C5: 我发现自己在没有AI帮助的情况下，解决复杂问题的能力有所下降 |

# **Survey Guidelines and Data Collection Procedures**

This study adopts a questionnaire survey method for data collection. The participants are undergraduate students, and the survey will be conducted in regular classrooms. A hybrid mode combining **in-person informed consent procedures** and **online questionnaire completion** is used to safeguard participants’ rights to informed consent while improving the efficiency and accuracy of data collection through digital tools.

## **1. Survey Guidelines**

These guidelines serve as the standardized communication script for investigators when interacting with students in classroom settings.

### ***1.1 Survey Objectives***

To clarify the purpose and significance of the survey and gain cooperation from students.To ensure that students fully understand the content of **informed consent**.To guide participants in completing the online questionnaire smoothly.

### ***1.2 On-Site Communication Procedures and Scripts***

#### Stage 1: Introduction

Procedure: Investigators enter the classroom during a break or at a scheduled time and stand at the podium or a visible location.

Script:“Hello everyone. Sorry to disturb you for a few minutes. We are researchers from a project on university students’ use of AI. We are here today to invite you to participate in a questionnaire survey for this study.”

#### Stage 2: Informed Consent Disclosure

Procedure: Show participants the ethical approval number.

Script:“Before we begin, I need to inform you of several important points. Your privacy will be fully protected. All data will be used **only for academic research and publication** and will never be disclosed. You have the right to participate or decline, and you may withdraw at any time during completion without any negative consequences. The questionnaire will take approximately 5–10 minutes to finish.”

#### Stage 3: Request for Consent

Script:“If you have no objections and are willing to participate, please prepare your mobile phone. If you prefer not to participate, you may quietly study or do your own work, and we fully respect your choice.”

Procedure: Look around the classroom to confirm students’ willingness to participate.

#### Stage 4: Online Instructions

Procedure: Post the Questionnaire Star link in the class WeChat group.

Script:“Please take out your phones, open the class WeChat group, and click the Questionnaire Star link to start. If you do not understand any items during completion, please raise your hand.”

#### Stage 5: Closing

Procedure: Confirm that most students have completed the questionnaire.

Script:“Thank you very much for your cooperation and support. Wish you all progress in your studies.”

## **2. Data Export and Processing**

### ***2.1 Data Export***

After on-site data collection, log in to the Questionnaire Star backend and export raw data in **Excel format**.

### ***2.2 Data Cleaning***

Exclude incomplete questionnaires.Exclude responses with obvious repetitive or patterned answering (e.g., selecting “A” for all items).

### ***2.3 Data Archiving***

Cleaned data will be stored encrypted on a dedicated computer. Original electronic questionnaires will be retained in the Questionnaire Star account for future verification.
